# Supplementary material for: Integrated mRNA and miRNA profile expression in livers of Jinhua and Landrace pigs
Source: PubMed Central journal article supplement (PMC6718901; doi:10.5713/ajas.18.0807), 2019-03-07

Table S1

| Gene name       | Primer sequence                                           |
|-----------------|-----------------------------------------------------------|
| Met-tRNA        | CAGAGTGGCGCAGCGGAAGC                                      |
| ssc-miR-204     | TTCCCTTTGTCATCCTATGCCT                                    |
| ssc-miR-34a     | TGGCAGTGTCTTAGCTGGTTGT                                    |
| ssc-miR-182     | TTGGCAATGGTAGAACTCACACT                                   |
| ssc-miR-184     | TGGACGGAGAACTGATAAGGGT                                    |
| ssc-miR-145-5p  | GTCCAGTTTTCCCAGGAATCCCTT                                  |
| ssc-miR-199a-3p | ACAGTAGTCTGCACATTGGTTA                                    |
| GAPDH           | F:GAAGATGGTGATGGGATTTC<br>R:GATGGTGAAGGTCGGAGTG           |
| CYP2R1          | F:CAATAGGATGCGGCGGAGTTG<br>R:TAGCGAGTAGATGTTGCCGAT        |
| DNPH1           | F:AGTGGTTGGAGCGCTGAAG<br>R:GCTCATGGATGGCTCTGTCA           |
| GLi1            | F:GAAGTCTGAGCTGGATGTGCTGGTG<br>R:CATGGATGTGTTGCTGTTGATGTG |
| FUT1            | F:CCAACGCCTCCGATTCCCTGT<br>R:GTGCATGGCAGGCTGGATGA         |
| TRNP1           | F:CAAACCCGAGGATCGACTGT<br>R:AAGGTCGGAGTTGAAGGTGG          |
| PRAP1           | F:AGAGCACCTCCACACTGA<br>R:GTCCAGGGTGTCTTGTTCC             |

Table S2. Summary of the sequencing reads alignment to the reference genome and annotation of ncRNAs

| Category      | JH1      | JH2      | JH3      | LD1      | LD2       | LD3      |
|---------------|----------|----------|----------|----------|-----------|----------|
| Clean reads   | 12632521 | 12199149 | 10672375 | 13341029 | 12713116  | 13932322 |
| Mapping reads | 12557637 | 1.21E+08 | 10601280 | 12608372 | 12608372  | 13819240 |
|               | 99.41%   | 98.96%   | 99.33%   | 99.15%   | 99.18%    | 99.19%   |
| miRNA         | 10966116 | 10284923 | 8971326  | 11366345 | 100948451 | 11768669 |
|               | 86.81%   | 84.31%   | 84.06%   | 85.20%   | 79.40%    | 84.47%   |
| tRNA          | 48194    | 80774    | 75276    | 95140    | 93785     | 55330    |
| rRNA          | 450458   | 607666   | 470347   | 589176   | 879814    | 740077   |
| snRNA         | 9790     | 10632    | 11794    | 10397    | 11081     | 9845     |
| snoRNA        | 68116    | 131849   | 71205    | 87560    | 43406     | 50019    |
| Y RNA etc     | 47806    | 41371    | 44770    | 53997    | 63806     | 64980    |
| Others        | 1042041  | 1041934  | 1027657  | 1138414  | 1526379   | 1243402  |

Table S3

| miRNA_ID        | JH1,JH2,JH3 | LD1,LD2,LD3 | up/down | log2(foldct) | P-value  | Significance-Lab |
|-----------------|-------------|-------------|---------|--------------|----------|------------------|
| ssc-miR-204     | 143.3017    | 1294.7377   | up      | 3.1755       | 2.11E-21 | **               |
| ssc-miR-34a     | 6.4556      | 51.1136     | up      | 2.9851       | 1.26E-12 | **               |
| ssc-miR-29b     | 35.8188     | 12.1915     | down    | -1.5548      | 2.36E-08 | **               |
| ssc-miR-9843-3p | 3.3733      | 14.9737     | up      | 2.1502       | 2.73E-06 | **               |
| ssc-miR-369     | 0           | 1.603       | up      | 7.3246       | 3.53E-06 | **               |
| ssc-miR-184     | 24.2232     | 4.5116      | down    | -2.4247      | 1.49E-05 | **               |
| ssc-miR-429     | 2.5116      | 10.0729     | up      | 2.0038       | 7.25E-05 | **               |
| ssc-miR-6782-3p | 2.1409      | 15.6437     | up      | 2.8693       | 0.000159 | **               |
| ssc-miR-182     | 40.9322     | 127.2289    | up      | 1.6361       | 0.000301 | **               |
| ssc-miR-145-5p  | 905.6333    | 2008.4624   | up      | 1.1491       | 0.000303 | **               |
| ssc-miR-676-3p  | 19.8427     | 48.9872     | up      | 1.3038       | 0.000324 | **               |
| ssc-miR-199b-3p | 3621.8412   | 8020.0944   | up      | 1.1469       | 0.000437 | **               |
| ssc-miR-183     | 3.5531      | 11.5173     | up      | 1.6967       | 0.000792 | **               |
| ssc-miR-199a-3p | 3664.866    | 7845.0885   | up      | 1.098        | 0.000935 | **               |
| ssc-miR-7135-3p | 0           | 2.0022      | up      | 7.6454       | 0.001244 | **               |
| ssc-miR-190a    | 1.0776      | 0           | down    | -6.7517      | 0.002018 | **               |
| ssc-miR-127     | 46.9284     | 138.6024    | up      | 1.5624       | 0.002307 | **               |
| ssc-miR-370     | 1.8371      | 8.2565      | up      | 2.1681       | 0.002548 | **               |
| ssc-miR-425-3p  | 129.9634    | 63.3639     | down    | -1.0364      | 0.002563 | **               |
| ssc-miR-181d-5p | 11.562      | 26.5066     | up      | 1.197        | 0.002575 | **               |
| ssc-miR-374b-5p | 150.12      | 307.3642    | up      | 1.0338       | 0.002744 | **               |
| ssc-miR-432-5p  | 0           | 1.0489      | up      | 6.7127       | 0.004829 | **               |
| ssc-miR-493-5p  | 0           | 1.0271      | up      | 6.6824       | 0.005356 | **               |
| ssc-miR-199b-5p | 425.9519    | 916.0519    | up      | 1.1047       | 0.005816 | **               |
| ssc-miR-652     | 0           | 1           | up      | 6.6439       | 0.005959 | **               |
| ssc-miR-9820-5p | 0.7105      | 0           | down    | -6.1508      | 0.006687 | **               |
| ssc-miR-1271    | 0.629       | 0           | down    | -5.975       | 0.006713 | **               |
| ssc-miR-219a    | 3.1225      | 1.4014      | down    | -1.1558      | 0.007524 | **               |
| ssc-miR-335     | 5.9349      | 2.2906      | down    | -1.3735      | 0.009085 | **               |
| ssc-miR-181b    | 94.1269     | 189.6128    | up      | 1.0104       | 0.009186 | **               |
| ssc-miR-1285    | 0           | 0.7181      | up      | 6.1661       | 0.009504 | **               |
| ssc-miR-7138-3p | 0           | 0.5972      | up      | 5.9001       | 0.015403 | *                |
| ssc-miR-133a-3p | 6.156       | 13.8854     | up      | 1.1735       | 0.017159 | *                |
| ssc-miR-374b-3p | 4.1827      | 9.1123      | up      | 1.1234       | 0.045271 | *                |
| ssc-miR-146b    | 26.8199     | 54.597      | up      | 1.0255       | 0.048875 | *                |

Table S4. Characteristics of mRNA sequencing

| Items            | JH1                 | JH2                  | JH3                  | LD1                  | LD2                  | LD3                  |
|------------------|---------------------|----------------------|----------------------|----------------------|----------------------|----------------------|
| Raw reads        | 10,575,778.00       | 13,534,880.00        | 14,418,516.00        | 12,510,741.00        | 14,427,239.00        | 14,176,304.00        |
| Clean reads      | 10,336,505          | 13,257,423           | 14,152,632           | 12,279,562           | 14,087,098           | 13,845,560           |
| Total mapped     | 9,150,794           | 11,485,590           | 12,853,044           | 11,088,637           | 12,485,248           | 12,574,527           |
| Q30(%)           | 95.08               | 96.06                | 96.25                | 96.28                | 94.88                | 94.94                |
| GC content       | 51.08               | 50.04                | 51.53                | 49.93                | 50.73                | 49.64                |
| Multiple mapping | 893,447<br>8.64%    | 1,117,776<br>8.43%   | 1,128,657<br>7.97%   | 946,685<br>7.71%     | 1,242,648<br>8.82%   | 1,097,450<br>7.93%   |
| Uniquely mapped  | 8,257,347<br>79.89% | 10,367,814<br>78.20% | 11,724,387<br>82.84% | 10,141,952<br>82.59% | 11,242,600<br>79.81% | 11,477,077<br>82.89% |
| Reads mapped to  | 4,404,010<br>42.61% | 5,553,415<br>41.89%  | 6,250,831<br>44.17%  | 5,381,477<br>43.82%  | 5,847,533<br>41.51%  | 6,213,086<br>44.87%  |
| Reads mapped to  | 4,746,784<br>45.92% | 5,932,175<br>44.75%  | 6,602,213<br>46.65%  | 5,707,160<br>46.48%  | 6,637,715<br>47.12%  | 6,361,441<br>45.95%  |
| exonic           | 82.08%              | 87.32%               | 81.28%               | 83.30%               | 81.18%               | 80.98%               |
| intronic         | 6.44%               | 4.90%                | 9.69%                | 5.99%                | 6.27%                | 6.56%                |
| intergenic       | 11.48%              | 7.78%                | 9.03%                | 10.71%               | 12.55%               | 12.46%               |

# The Difference of miRNA Profiles

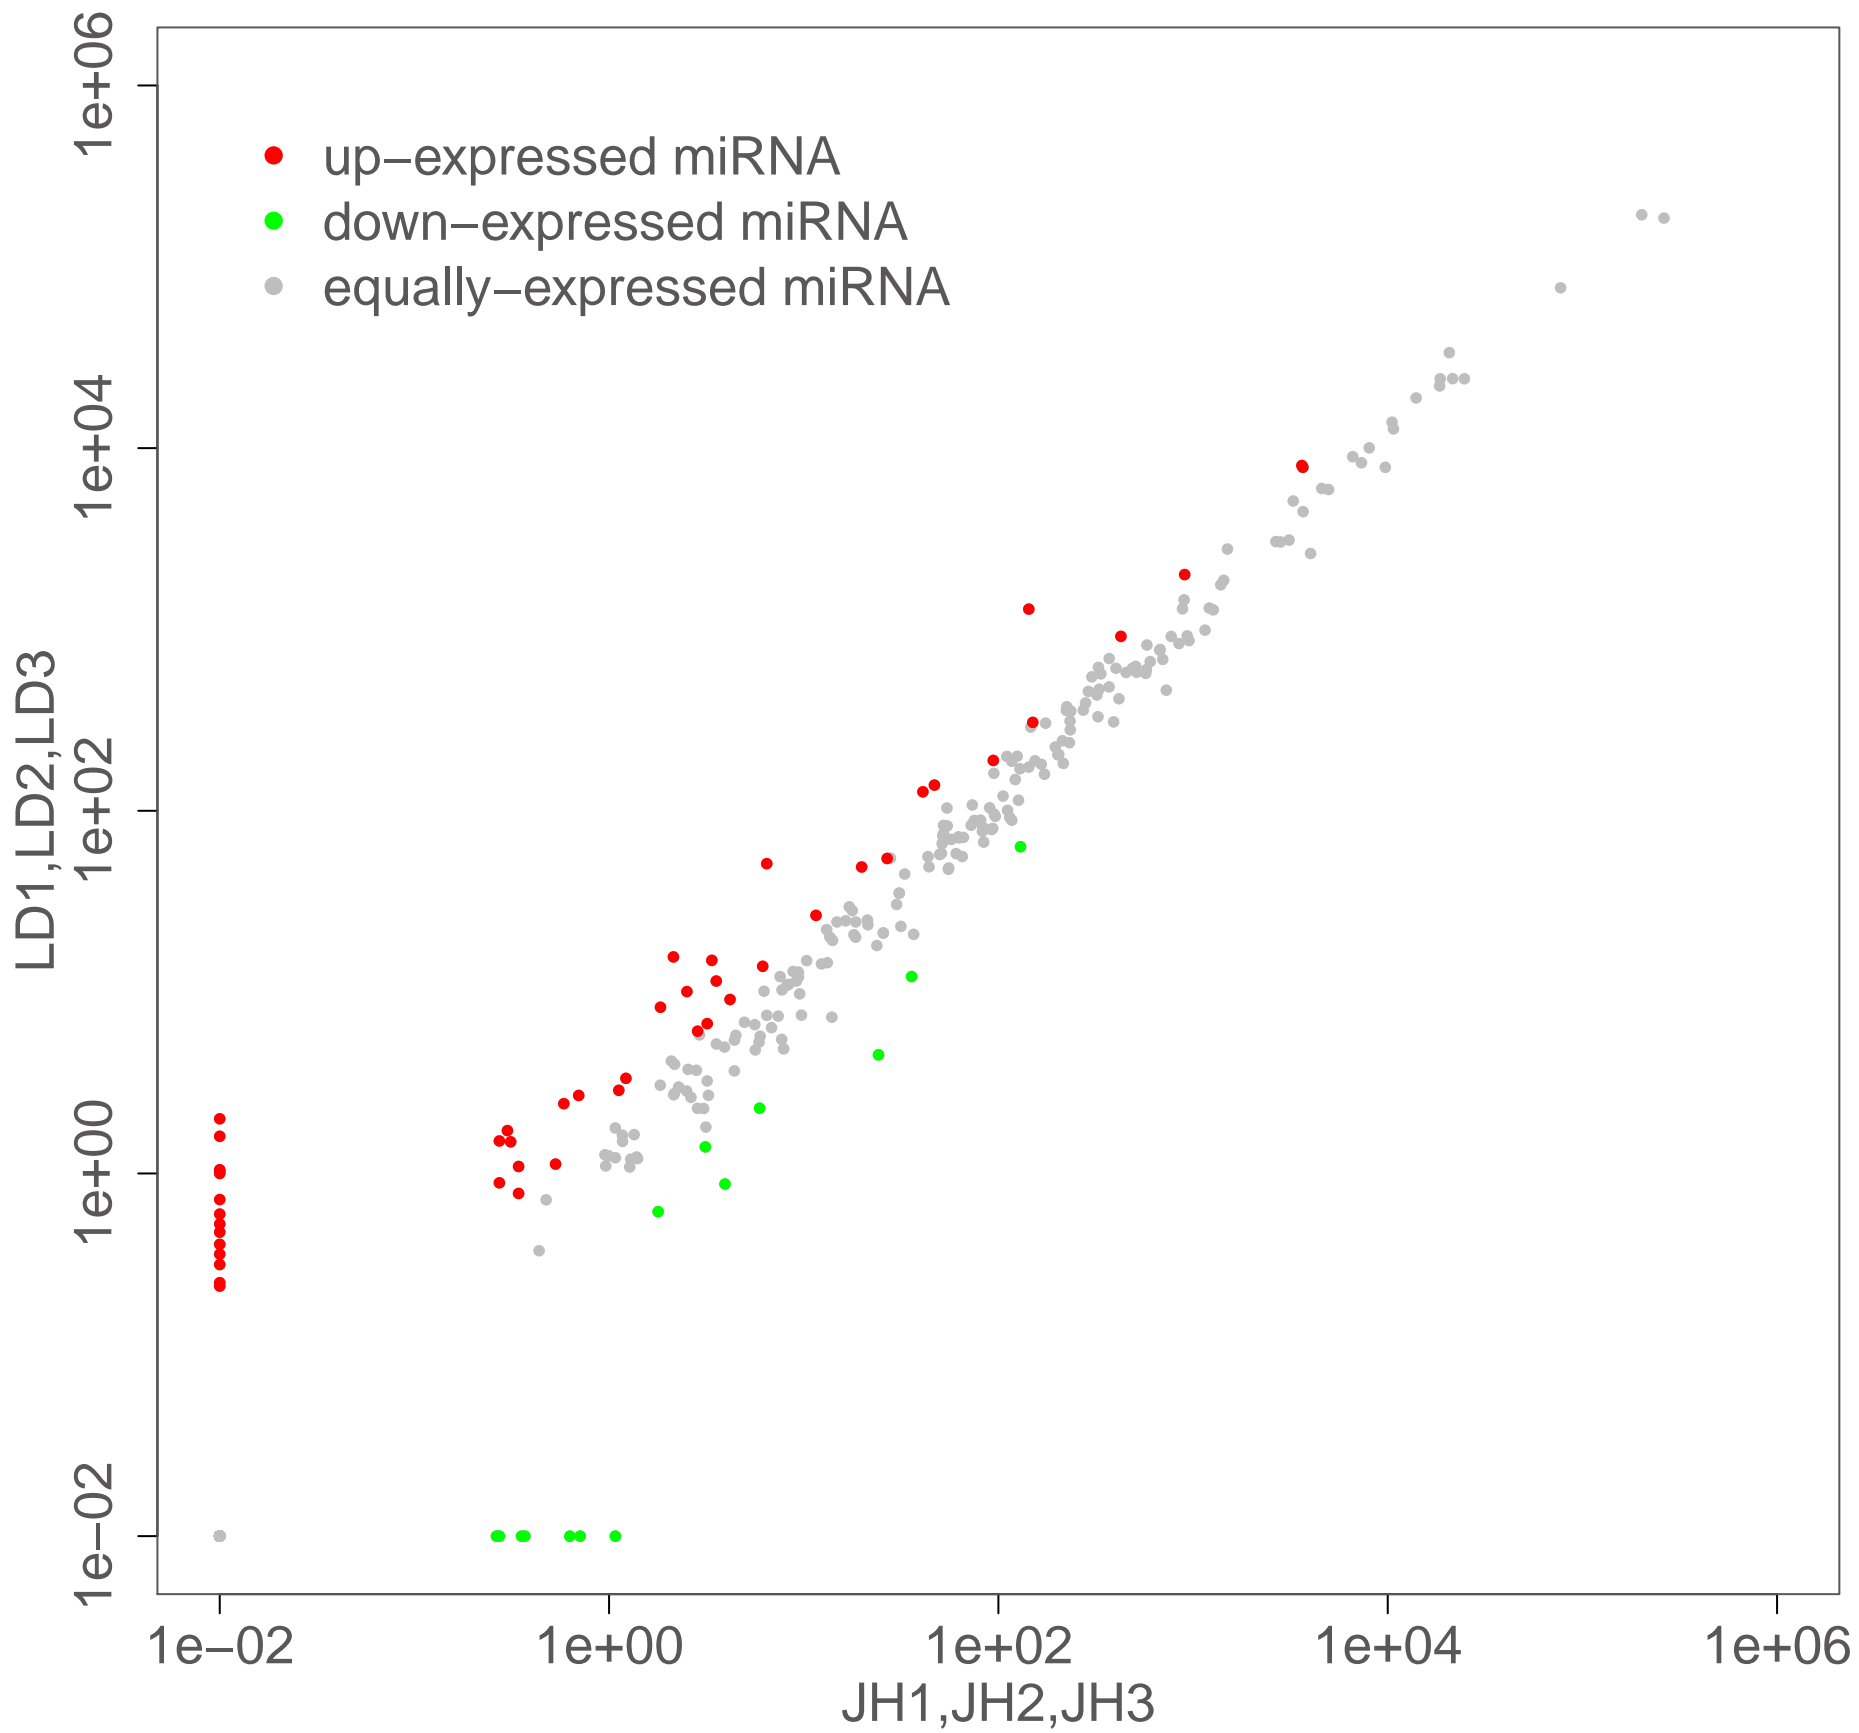

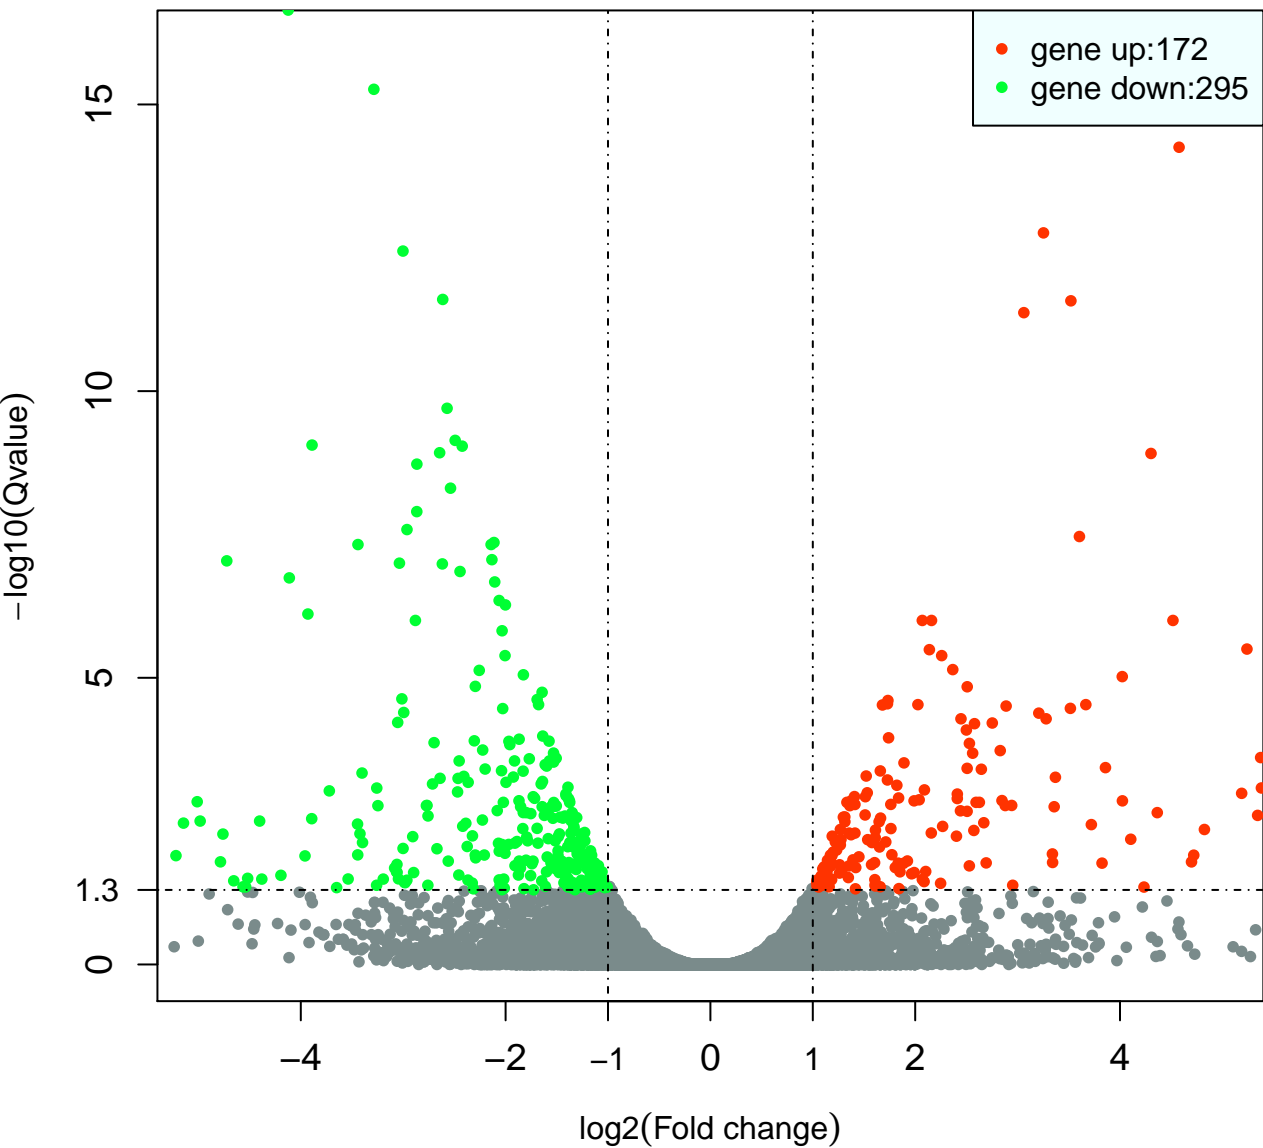

Supplement: ajas-18-0807-suppl.pdf [file ajas-18-0807-suppl.pdf]
